# Supplementary material
Source: HighWire-hosted journal article supplement (https://bmjopen.bmj.com/content/9/9/e028379)
Supplement: inline-supplementary-material-1 [file inline-supplementary-material-1.pdf]

**APPENDIX 1****Summary of search results**

| <b>Database</b>                                                               | <b>Platform</b>        | <b>Years covered</b>                                                                                          | <b>Date conducted</b> | <b># results</b>                |
|-------------------------------------------------------------------------------|------------------------|---------------------------------------------------------------------------------------------------------------|-----------------------|---------------------------------|
| Medline                                                                       | PubMed                 | 1946-current                                                                                                  | April 11, 2018        | 964                             |
|                                                                               |                        | April 11,2018-current                                                                                         | June 17, 2019         | 156                             |
| CINAHL                                                                        | EBSCO                  | 1981- current                                                                                                 | April 11, 2018        | 626                             |
|                                                                               |                        | April 11,2018 - current                                                                                       | June 17, 2019         | 127                             |
| Embase                                                                        | Embase.com             | 1974-current                                                                                                  | April 11, 2018        | 1,283                           |
|                                                                               |                        | 2018- current                                                                                                 | June 17, 2019         | 226                             |
| Web of Science (Core Collection)                                              | WOS                    | 1900-current                                                                                                  | April 11, 2018        | 15                              |
| Web of Science<br>SCI-EXPANDED<br>SSCI<br>A&HCI<br>CPCI-S<br>CPCI-SSH<br>ESCI | Clarivate Analytics    | 1900-current                                                                                                  | June 17, 2019         | 1642                            |
| Cochrane Library                                                              | Wiley                  | CDSR : Issue 4 of 12, April 2018<br><br>CCRCT : Issue 3 of 12, March 2018<br><br>CMR: Issue 3 of 4, July 2012 | April 11, 2018        | 187                             |
| Cochrane                                                                      | Wiley                  | April 2018-present<br>Reviews & Trials:<br>Issue 6 of 12,<br>June 2019                                        | 6/20/2019             | 368<br>(excluding 2 editorials) |
| American Society of Colorectal Surgery annual meeting                         | Conference proceedings | 2010-current                                                                                                  | 2019                  | 0                               |
| <b>Total</b>                                                                  |                        |                                                                                                               |                       | <b>5,594</b>                    |
| <b>Total with Duplicates Removed</b>                                          |                        |                                                                                                               |                       | <b>3773</b>                     |
